# Supplementary material for: Z-scheme photocatalytic hydrogen production over WO3/g-C3N4 composite photocatalysts
Source: Royal Society of Chemistry journal article supplement (doi:10.1039/c4ra02511c), 2014-01-01
Supplement: c4ra02511c1.pdf [file c4ra02511c1.pdf]

## Electronic Supplementary Information

### **Z-scheme photocatalytic hydrogen production over WO<sub>3</sub>/g-C<sub>3</sub>N<sub>4</sub> composite photocatalysts**

Hideyuki Katsumata,<sup>\*a</sup> Yusuke Tachi,<sup>a</sup> Tohru Suzuki<sup>b</sup> and Satoshi Kaneco<sup>a</sup>

<sup>a</sup>Department of Chemistry for Materials, Graduate School of Engineering, Mie University,  
Tsu, Mie 514-8507, Japan

<sup>b</sup>Environmental Preservation Center, Mie University, Tsu, Mie 514-8507, Japan

---

\*Corresponding Author.

Phone/fax: +81-59-231-9425; e-mail: hidek@chem.mie-u.ac.jp.

## **Experimental section**

### **Preparation of WO<sub>3</sub>/g-C<sub>3</sub>N<sub>4</sub> composite photocatalysts**

All chemicals used in this study were of analytical grade and were used without further purification. The commercially available WO<sub>3</sub> nanoparticles were obtained from Aldrich and were used here. g-C<sub>3</sub>N<sub>4</sub> powder was prepared by direct heating urea (Nacalai tesque) at 500 °C in an muffle furnace for 2 h in an alumina crucible with a cover at a heating rate of 20 °C/min; the further heat treatment was performed at 520 °C for 2 h. After cooling to room temperature, the product was then collected and ground into powder. The synthesis of WO<sub>3</sub>/g-C<sub>3</sub>N<sub>4</sub> composite photocatalysts was as follows: various amounts of WO<sub>3</sub> with a suitable amount of g-C<sub>3</sub>N<sub>4</sub> were added into an agate mortar and ground for 30 min using a pestle. The resulting mixture was calcined at 450 °C for 4 h at a ramp rate of 20 °C/min in an alumina crucible with a cover. The obtained samples were ground into powder.

### **Characterization**

The powder X-ray diffractometer (XRD, RIGAKU Ultima IV, sample horizontal type) was used in order to record the diffraction patterns of photocatalysts employing Cu K $\alpha$  radiation. The fourier transform infrared spectra (FTIR) of the samples were recorded using a SPECTRUM 100 FTIR spectrometer (Perkin Elmer) equipped with an ATR assembly. X-ray photoelectron spectroscopy (XPS) measurements were carried out with a PHI Quantera SXM photoelectron spectrometer using Al K $\alpha$  radiation. A Hitachi S-4000 scanning electron microscope (SEM) and a JEOL JEM-1011 transmission electron microscope (TEM) were employed to observe the morphologies of the samples. High resolution TEM (HRTEM) observation was conducted using a Hitachi H-9000 TEM. The UV–visible diffuse reflectance spectra (DRS) of the photocatalysts were recorded using a Shimadzu UV-2450 spectrophotometer equipped with an integral sphere assembly. Photoluminescence (PL) spectra of oxide powders were measured at room temperature

using a Shimadzu RF-5300PC system equipped with solid sample holder.

### **Photocatalytic H<sub>2</sub> production**

The pyrex column vessel reactor (inner volume: 123 mL) was used for the photocatalytic H<sub>2</sub> production from aqueous solution (40 mL) containing 10 vol% triethanolamine (TEA, Kishida Chemicals) as a sacrificial donor. 2 wt% Pt loaded on the surface of the photocatalyst by the in situ photodeposition method using H<sub>2</sub>PtCl<sub>6</sub> (Wako Pure Chemicals). Before irradiation, N<sub>2</sub> gas was bubbled into the reaction solution for 30 min to remove a dissolved O<sub>2</sub>. Typically, 40 mg of the photocatalyst were added into the reaction solution. The top of the reactor was tightly closed by a silicon rubber. A 300 W Xe lamp (MAX-303, Asahi Spectra) was applied as an artificial solar light source, which was positioned on the side of the photoreactor. In the case of visible light (>420 nm) irradiation, a UV cutoff filter (L-42, HOYA) was used. The photocatalysts were continuously dispersed in the aqueous TEA solution by a magnetic stirrer during the light irradiation. The photocatalytic reaction was performed at room temperature. The concentration of H<sub>2</sub> production from the aqueous TEA solution was analyzed by gas chromatography (GL Sciences, GC-3200) with thermal conductivity detector (TCD). The stainless column (4 m length, 2.17 mm i.d.) packed with Molecular Sieve 5A was used for the separation. The carrier gas was high purity Ar gas. The temperature conditions of GC were 50 °C for injection, column and detector. The apparent quantum efficiency (AQY) was estimated by using the equation:  $AQY (\%) = (2 \times H/I) \times 100$ , where  $H$  and  $I$  represent the numbers of evolved H<sub>2</sub> molecules and incident photons, respectively. The number of incident photons was measured using a calibrated Si photodiode. To estimate the AQY, a LED 405 nm lamp (Optocode) was applied as a light source.

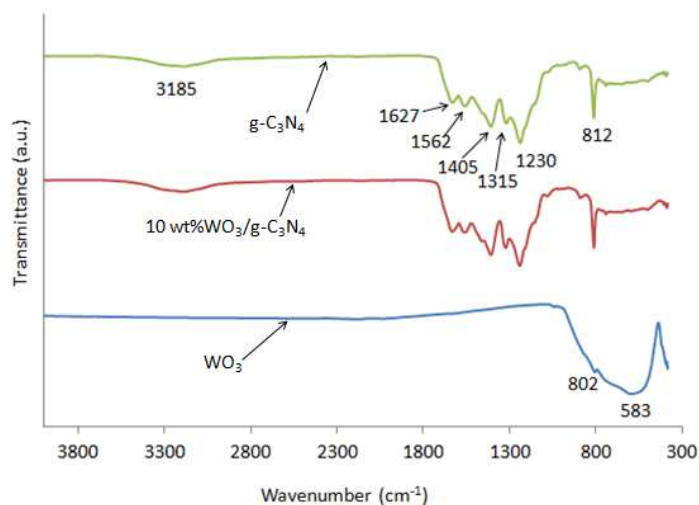

Fig. S1. FTIR spectra of g-C<sub>3</sub>N<sub>4</sub>, WO<sub>3</sub> and 10 wt% WO<sub>3</sub>/g-C<sub>3</sub>N<sub>4</sub> composite photocatalysts.

For the pure g-C<sub>3</sub>N<sub>4</sub>, the peaks at 1627 cm<sup>-1</sup> could be attributed to C-N stretching vibration modes, while those at 1230, 1315, 1405 and 1562 cm<sup>-1</sup> could be assigned to aromatic C-N breathing modes.<sup>S1</sup> The sharp band at 812 cm<sup>-1</sup> and the broad bands at around 3200 cm<sup>-1</sup> were indicative of the breathing mode of the triazine units and the N-H stretching vibration modes, respectively.<sup>S2</sup> For the pure WO<sub>3</sub>, the broad peak around 320-850 cm<sup>-1</sup> was clearly observed, which corresponds to O-W-O and W-O-W stretching vibration modes in WO<sub>3</sub>.<sup>S3</sup> On the other hand, the broad peak could not be observed in the 10 wt% WO<sub>3</sub>/g-C<sub>3</sub>N<sub>4</sub> composite sample, which would be due to the low content of WO<sub>3</sub> and the existence of g-C<sub>3</sub>N<sub>4</sub>.<sup>S4</sup>

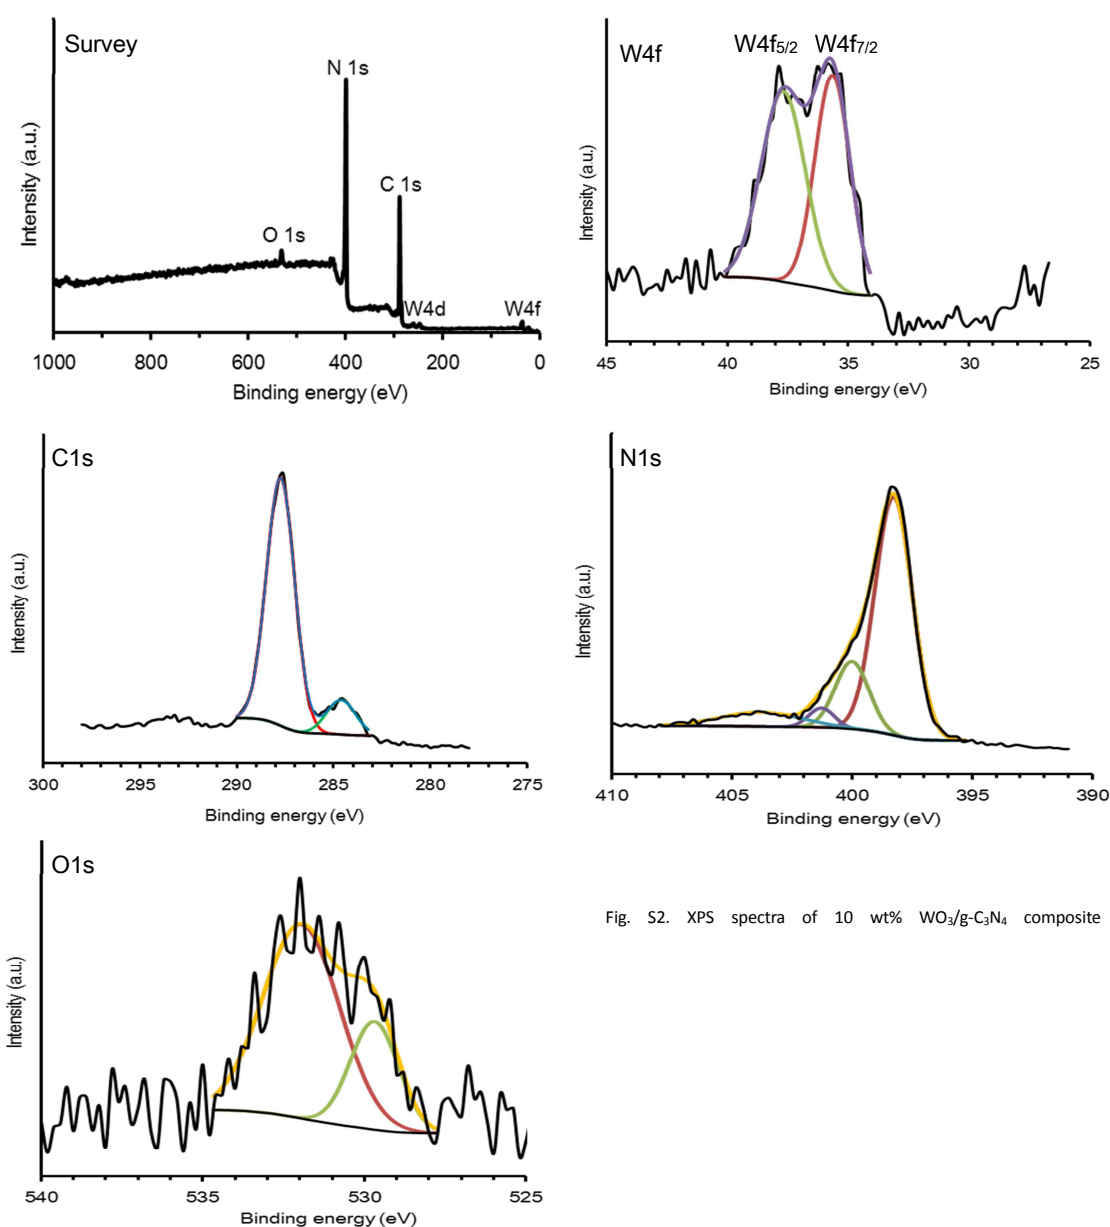

Fig. S2. XPS spectra of 10 wt%  $\text{WO}_3/\text{g-C}_3\text{N}_4$  composite

It was clearly seen that only W, O, C and N elements were detected in the XPS survey spectrum. No peaks for other elements were found, indicating that the 10 wt%  $\text{WO}_3/\text{g-C}_3\text{N}_4$  composite is primarily composed of W, O, C and N elements. The W 4f XPS spectra displayed two peaks at 35.6 and 37.7 eV that could be attributed to W 4f<sub>7/2</sub> and 4f<sub>5/2</sub>, respectively. These values were ascribed to the W<sup>6+</sup> state in oxides and are consistent with reported values.<sup>S5</sup> The O1s peak centered at 529.7 eV is associated with the O<sup>2-</sup> in the  $\text{WO}_3$ . The other O1s peak at 531.9 eV is associated with the presence of an -OH group or a water molecule on the surface of the 10 wt%  $\text{WO}_3/\text{g-C}_3\text{N}_4$  composite photocatalyst.<sup>S6</sup> It can be seen from C1s spectrum that the 10 wt%  $\text{WO}_3/\text{g-C}_3\text{N}_4$  showed the two C 1s peaks located at 284.6 and 287.7 eV. The former is ascribed to the adventitious hydrocarbon from the XPS instrument itself and defect-containing sp<sup>2</sup>-hybridized carbon atoms present in graphitic domains, while the latter one is assigned to C-N-C coordination.<sup>S7</sup> In the N1s spectrum several binding energies could be separated including triazine rings (C-N-C, 398.4 eV), tertiary nitrogen (N-(C)<sub>3</sub>, 400.1 eV), amino functions (N-H, 401.6 eV) and the charge effects (403.8 eV).<sup>S7</sup>

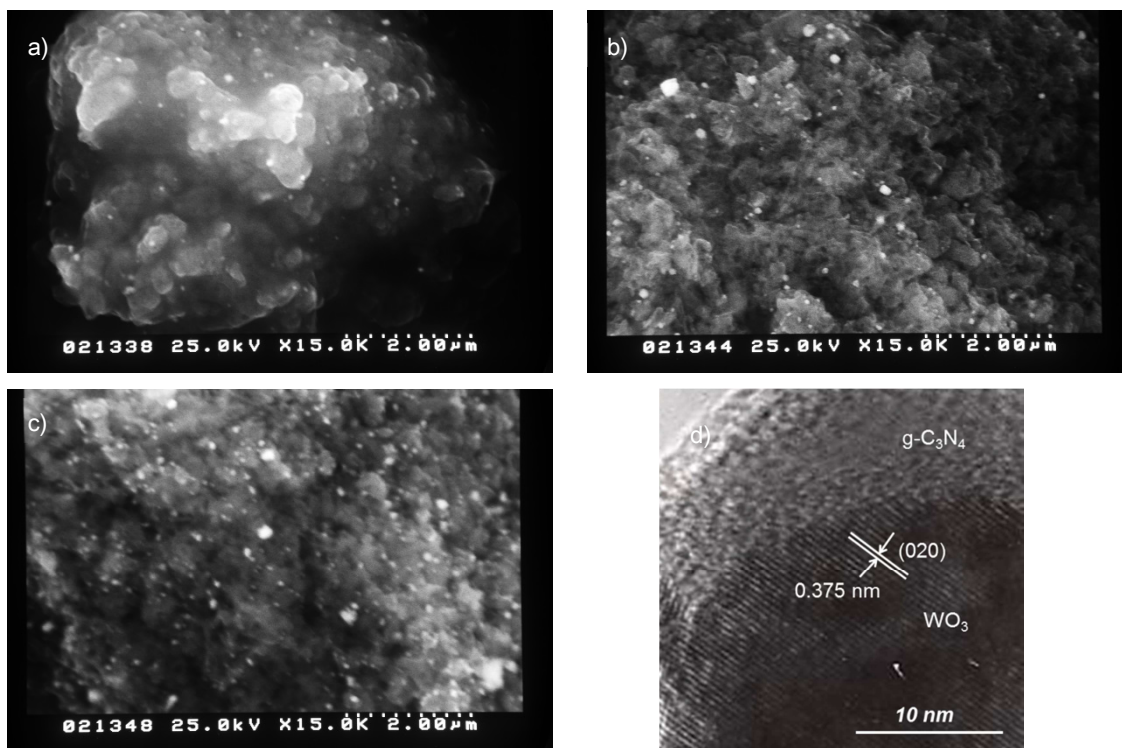

Fig. S3. SEM images of a) 5 wt%, b) 15 wt%, c) 30 wt%  $\text{WO}_3/\text{g-C}_3\text{N}_4$ , and d) HRTEM image of 10 wt%  $\text{WO}_3/\text{g-C}_3\text{N}_4$  composite photocatalysts.

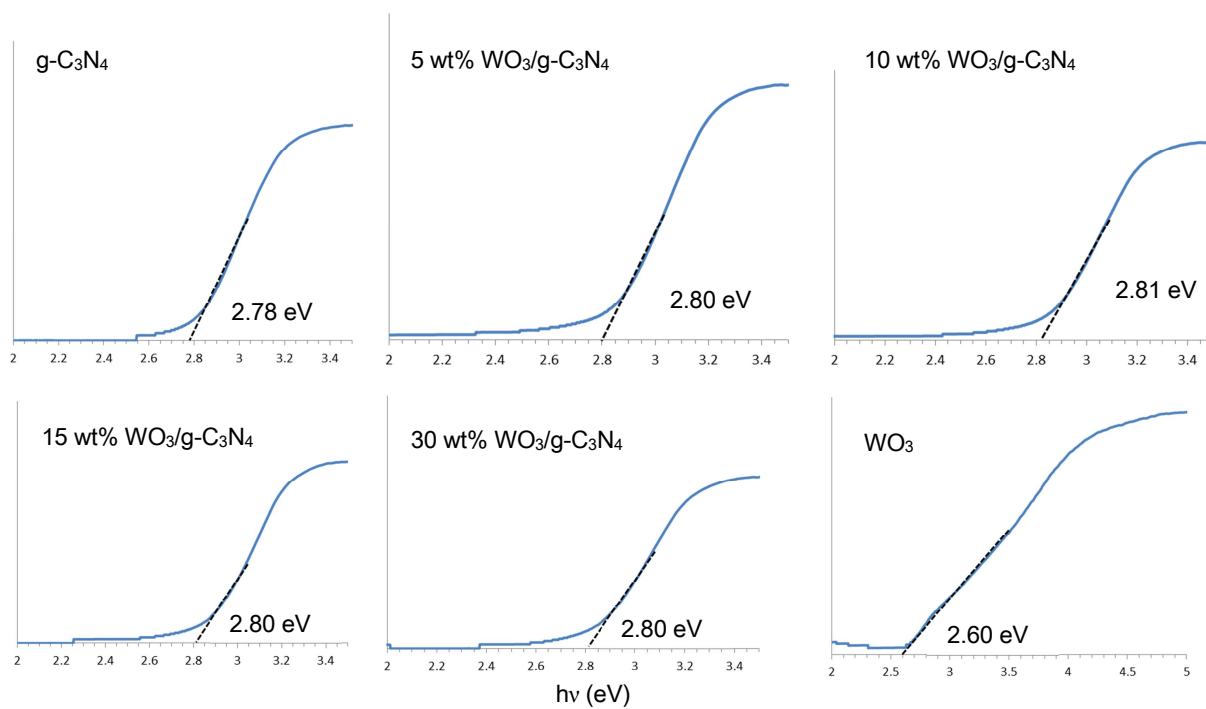

Fig. S4. Tauc plots of  $\text{g-C}_3\text{N}_4$ ,  $\text{WO}_3$  and  $\text{WO}_3/\text{g-C}_3\text{N}_4$  composite photocatalysts.

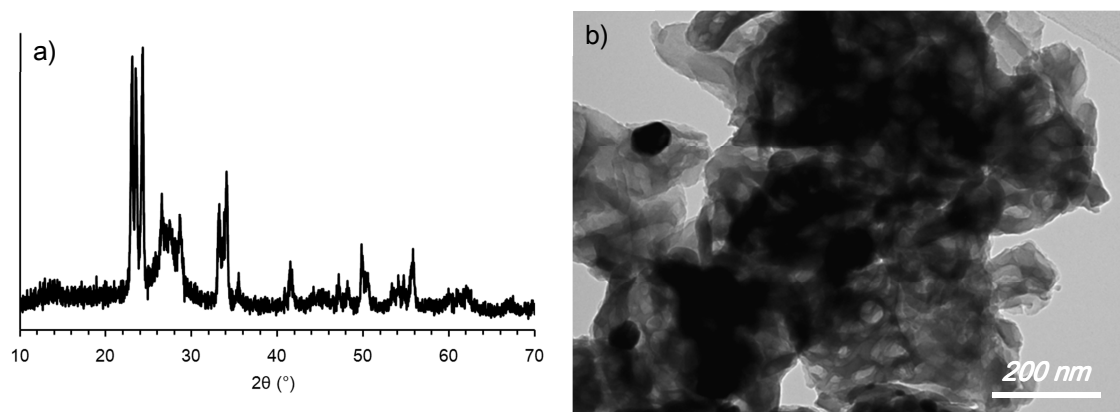

Fig. S5. a) XRD pattern and b) TEM image of 10 wt%  $\text{WO}_3/\text{g-C}_3\text{N}_4$  composite after photocatalytic reaction.

## References

- S1. L. Liu, D. Ma, H. Zheng, X. J. Li, M. J. Cheng and X. H. Bao, *Microporous Mesoporous Mater.*, 2008, **110**, 216.
- S2 S.C. Yan, Z.S. Li and Z.G. Zou, *Langmuir*, 2009, **25**, 10397; M.J. Bojdys, J.O. Müller, M. Antonietti and A. Thomas, *Chem. Eur. J.*, 2008,**14**, 8177.
- S3 J. Sungpanich, T. Thongtem and S. Thongtem, *Mater. Lett.*, 2011, **65**, 3000.
- S4 L. Huang, H. Xu, Y. Li, H. Li, X. Cheng, J. Xia, Y. Xu and G. Cai, *Dalton Trans.*, 2013, 42, 8606.
- S5 H. Qi, C.Y. Wang and J. Liu, *Adv. Mater.*, 2005, **15**, 411.
- S6 A. Chakraborty and M. Kebede, *React. Kinet., Mech. Catal.*, 2012, **106**, 83.
- S7 F. Dong, L. Wu, Y. Sun, M. Fu, Z. Wu and S. Lee, *J. Mater. Chem.*, 2011, **21**, 15171.
